# Supplementary material for: Technical note: Transit time distributions are not L-shaped
Source: Copernicus journal article supplement (doi:10.5194/hess-2017-497), 2017-08-16
Supplement: Supplementary file [file hess-2017-497-AC7-supplement.pdf]

My thanks for the comment. It is interesting to see models developed as alternatives to L-shaped forms in the context of the instantaneous unit hydrograph, with zero discharge at time zero.
