# Supplementary material for: Technical note: Transit time distributions are not L-shaped
Source: Copernicus journal article supplement (doi:10.5194/hess-2017-497), 2017-08-16
Supplement: Supplementary file [file hess-2017-497-AC8-supplement.pdf]

My thanks James for taking the time to respond. You have nicely summarised how the case for L-shaped transit time distributions could be argued. My apologies for a little delay in my reply.
